# Supplementary material for: Light induced water oxidation on cobalt-phosphate (Co–Pi) catalyst modified semi-transparent, porous SiO2–BiVO4 electrodes
Source: Royal Society of Chemistry journal article supplement (doi:10.1039/c2cp40673j), 2012-01-01
Supplement: c2cp40673j.pdf [file c2cp40673j.pdf]

## Supporting Information

### Light induced water oxidation on cobalt-phosphate (Co-Pi) catalysts modified semi-transparent, porous $\text{SiO}_2\text{-BiVO}_4$ electrodes

Satyananda Kishore Pilli,<sup>a</sup> Todd G. Deutsch,<sup>c</sup> Thomas E. Furtak,<sup>b</sup> Logan. D. Brown,<sup>a</sup> John A. Turner,<sup>c</sup> and Andrew M. Herring.<sup>a\*</sup>

Department of Chemical and Biological Engineering <sup>a</sup> and Department of Physics<sup>b</sup>

Colorado School of Mines

Golden, CO 80401, USA

Energy Sciences<sup>c</sup>

National Renewable Energy Laboratory

Golden, CO 80401, USA

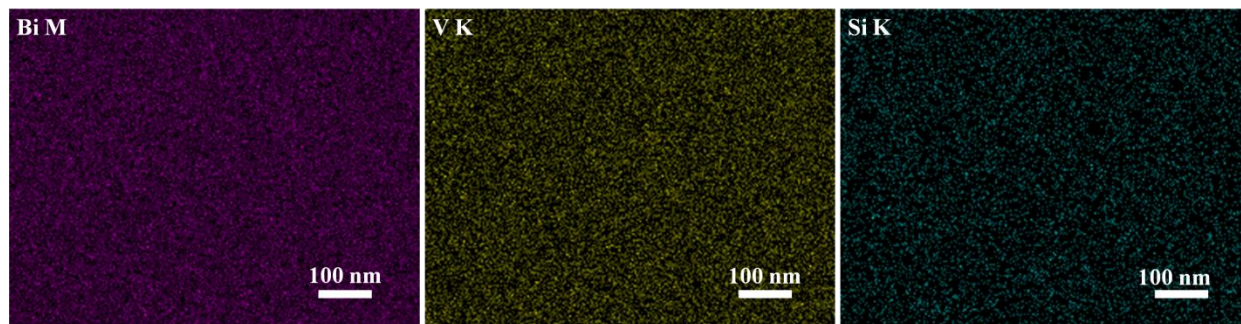

**Fig. S1** Energy dispersive X-ray analysis (EDX) maps of  $\text{SiO}_2\text{-BiVO}_4$  electrode investigated in the Bi(M), V(K) and Si (K) transition at 10 keV.

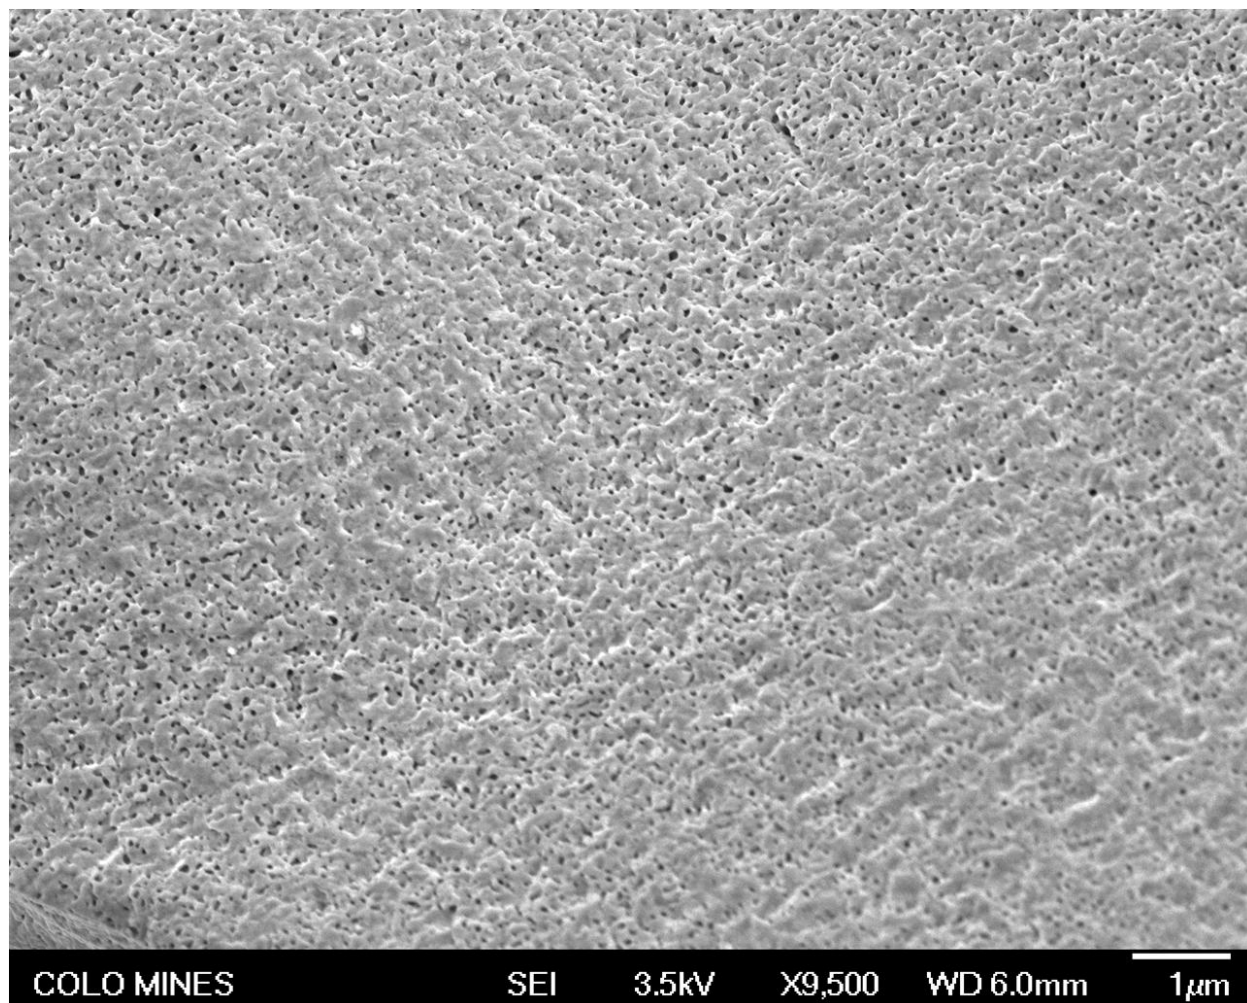

**Fig. S2** SEM image of porous  $\text{BiVO}_4$  electrode.

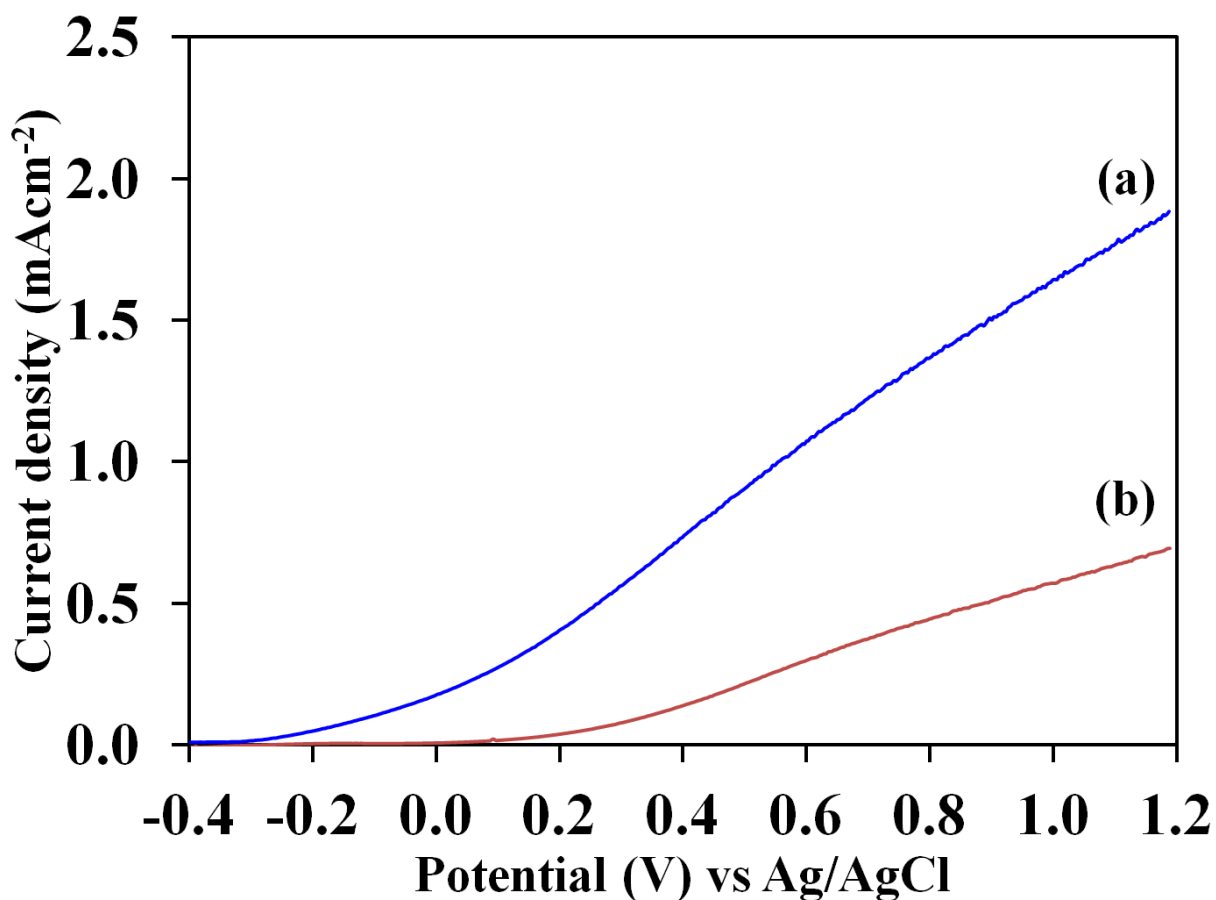

**Fig. S3** Linear sweep voltammograms of PED Co-Pi/SiO<sub>2</sub>-BiVO<sub>4</sub> (a) and SiO<sub>2</sub>-BiVO<sub>4</sub> (b) electrodes measured (scan rate, 25 mV/s) with continuous light (100 mW/cm<sup>2</sup>) in 0.5M Na<sub>2</sub>SO<sub>4</sub> (pH7) solution.

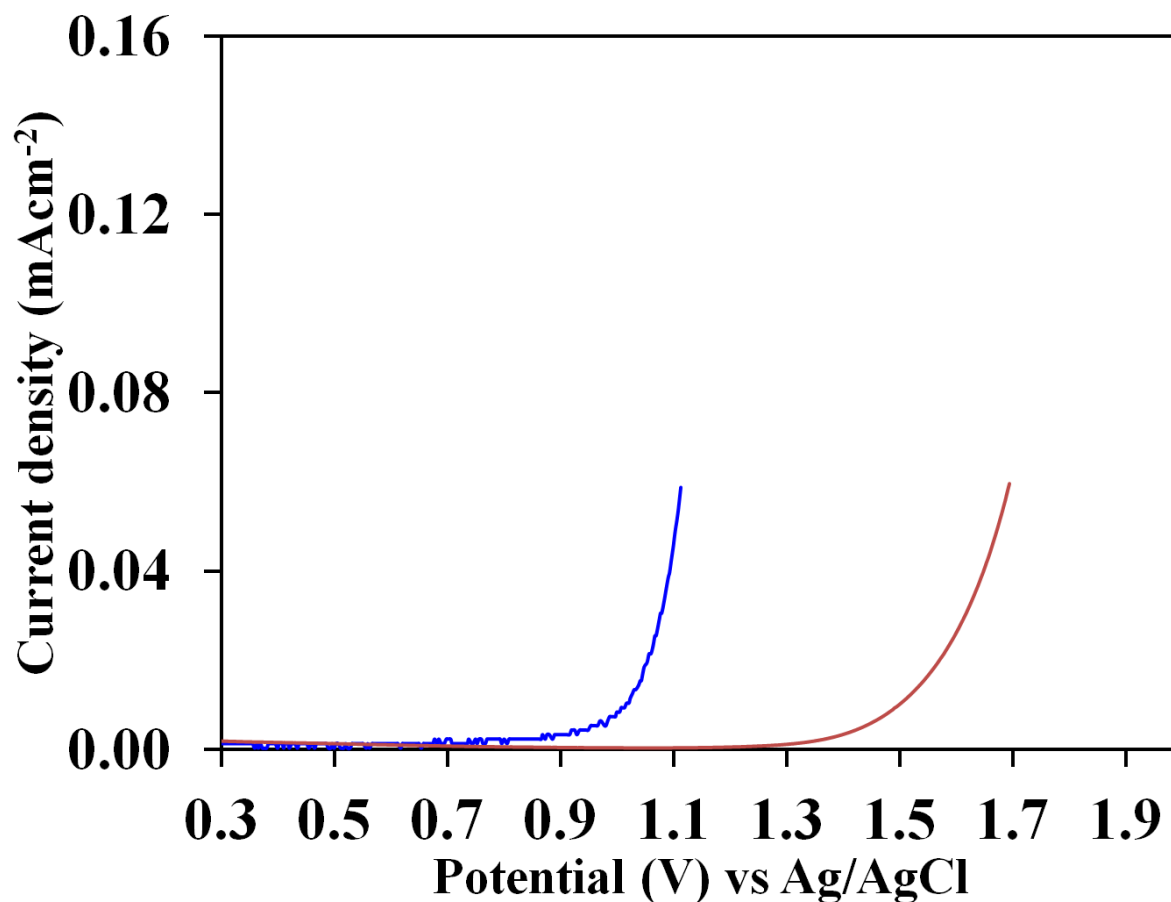

**Fig. S4** Linear sweep voltammograms of SiO<sub>2</sub>-BiVO<sub>4</sub> (red) and PED Co-Pi/SiO<sub>2</sub>-BiVO<sub>4</sub> (blue) electrodes measured (scan rate, 25 mV/s) under dark using 0.5M Na<sub>2</sub>SO<sub>4</sub> aqueous solution in phosphate buffer (pH7) electrolyte.

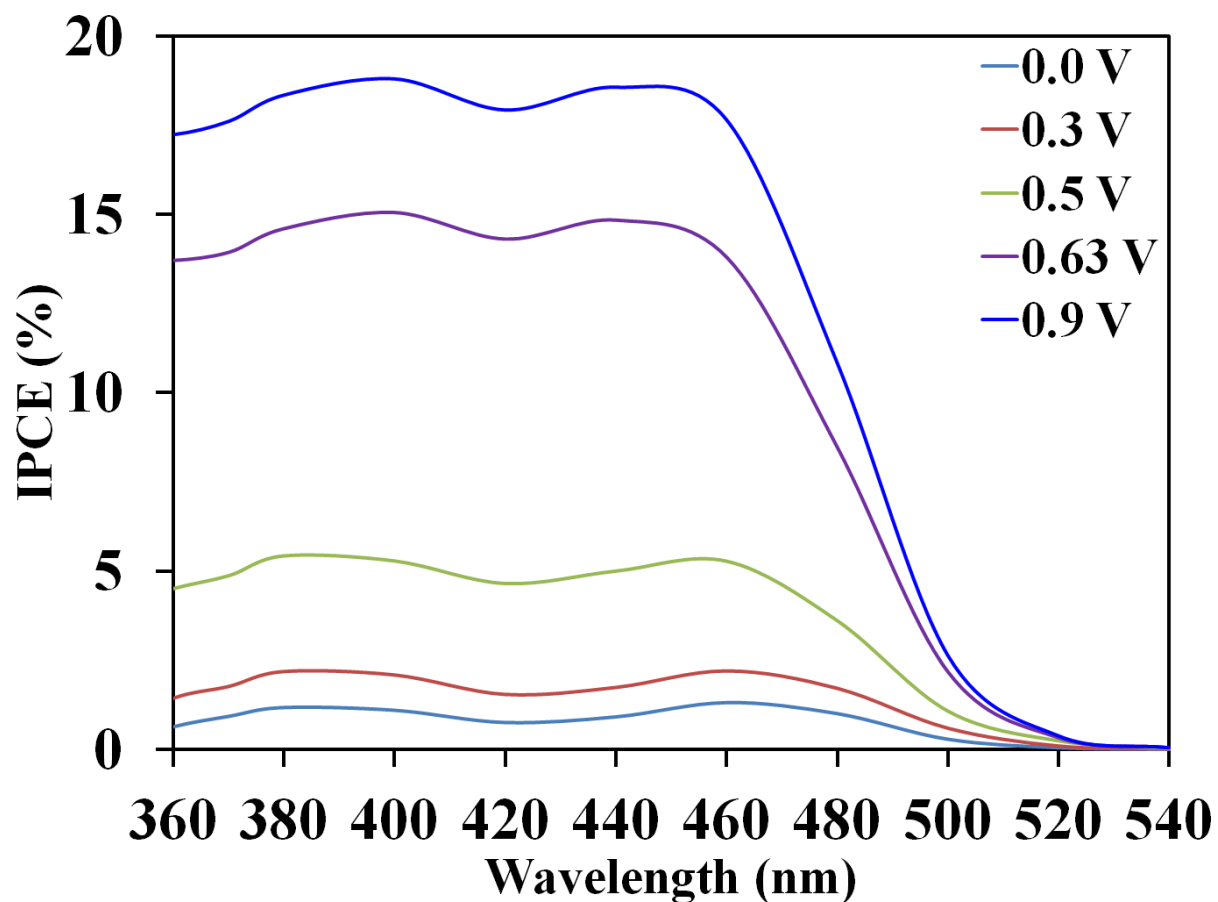

**Fig. S5** IPCE plot of  $\text{SiO}_2\text{-BiVO}_4$  electrode measured at 0.0, 0.3, 0.5, 0.63, 0.9 V vs. Ag/AgCl in 0.5 M  $\text{Na}_2\text{SO}_4$  (pH 7 phosphate buffered).

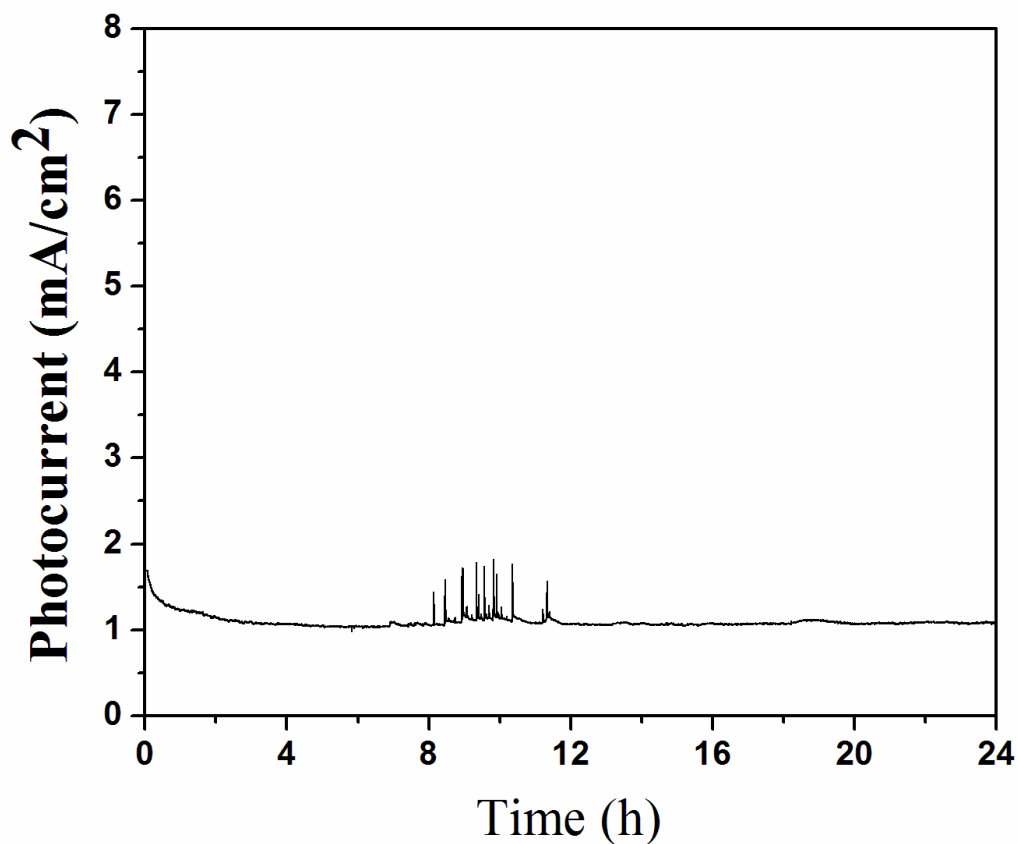

**Fig. S6** The photocurrent vs. time (chronoamperometry) plot of PED Co-Pi/SiO<sub>2</sub>-BiVO<sub>4</sub> photoanode measured under short-circuit conditions at an applied bias of 0.7 V vs. Pt counter electrode in 0.5 M Na<sub>2</sub>SO<sub>4</sub>. The measurements were performed under continuous 1 sun, AM 1.5 simulated solar irradiation for 24 h.
